# Supplementary material for: MYBPC2 and MYL1 as Significant Gene Markers for Rhabdomyosarcoma
Source: PubMed Central journal article supplement — Technol Cancer Res Treat. 2021 Jan 27;20:1533033820979669. doi: 10.1177/1533033820979669 (PMC7844451; doi:10.1177/1533033820979669), 2021-01-27
Supplement: Supplementary_materials_1.pdf [file Supplementary_materials_1.pdf]

Supplementary material 1: Overlapping of MCODE module genes in DEGs of 8 Endothelial Rhabdomyosarcoma (ERMS) vs 6 control samples and 10 Alveolar Rhabdomyosarcoma (ARMS) vs 6 control samples. A total of 707 DEGs were identified between 8 ERMS and 6 control samples with cutoff:  $p < 0.05$ ,  $|\log_{2}FC| > 2$ . A total of 544 DEGs were identified between 10 ARMS and 6 control samples with cutoff:  $p < 0.05$ ,  $|\log_{2}FC| > 2$ . Protein-protein interaction (PPI) network was Constructed respectively. MCODE module genes were obtained respectively. MYBPC2 and MYL1 were included in the two MCODE genes. It suggested that MYBPC2 and MYL1 may be associated with the pathogenesis of ERMS and ARMS.

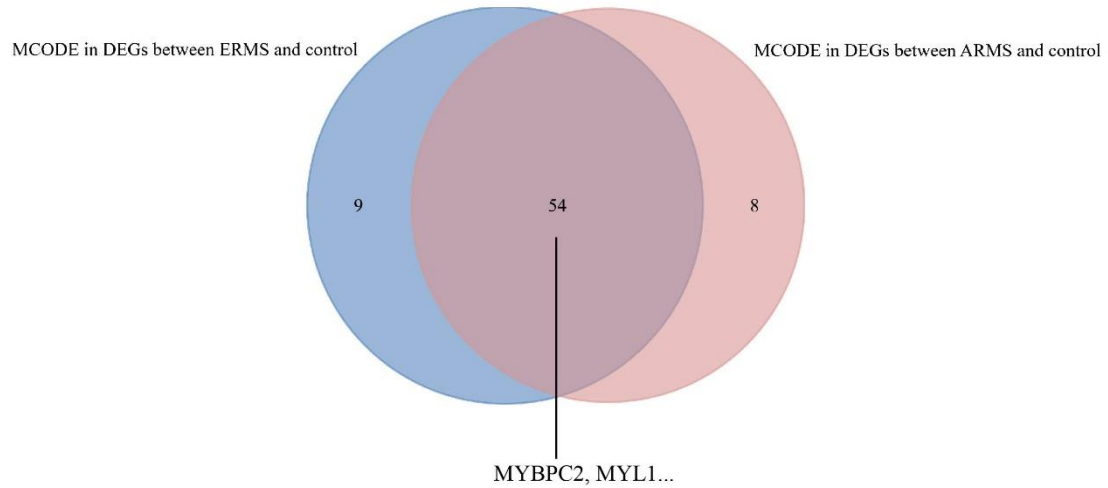

Supplementary material 2: Preliminarily functional study explorations of MYBPC2 and MYL1. Part of our preliminarily functional study explorations were obtained from GenomeRNAi (<http://www.genomerna.org/v17/genedetails/4632>; Schmidt et al. (2012)). The MYBPC2 and MYL1 mainly participated in the progress of cell division. In future study, we will expand the sample size and further explore the mechanism. (A) MYBPC2, (B) MYL1.

(A)

| Screen Title      | Gene Ids [?]    | Gene Symbols | Reagent Ids [?]   | Score [?]  | Phenotype [?]                                                                      | Comments   |
|-------------------|-----------------|--------------|-------------------|------------|------------------------------------------------------------------------------------|------------|
| Cell division (1) | ENSG00000086967 | MYBPC2       | ENSG00000086967   | sp         | Increased G1 DNA content                                                           | G0/1 [...] |
| Cell division (2) | ENSG00000086967 | MYBPC2       | ENSG00000086967_2 | sp         | none                                                                               |            |
| Cell division (3) | ENSG00000086967 | MYBPC2       | ENSG00000086967   | -1.80 [..] |  | none       |
| Cell division (4) | ENSG00000086967 | MYBPC2       | ENSG00000086967   | 0.60 [..]  |  | none       |

(B)

| Screen Title                       | Gene Ids [?]    | Gene Symbols | Reagent Ids [?] | Score [?]   | Phenotype [?]                                                                        | Comments        |
|------------------------------------|-----------------|--------------|-----------------|-------------|--------------------------------------------------------------------------------------|-----------------|
| Cell division (1)                  | ENSG00000168530 | MYL1         | ENSG00000168530 | sp          | Increased G1 DNA content                                                             | secondary [...] |
| Ciliogenesis and cilium length (1) | 4632            | MYL1         | 35906           | -7.70 [..]  |  | none            |
| Ciliogenesis and cilium length (1) | 4632            | MYL1         | 35906           | 43.68 [..]  |  | none            |
| Ciliogenesis and cilium length (1) | 4632            | MYL1         | 118413          | -95.87 [..] |  | none            |
